# Supplementary material for: Genotypic variability in cotton's transpiration response under progressive soil drying
Source: PubMed Central journal article supplement (PMC11652182; doi:10.3389/fpls.2024.1451993), 2024-12-04
Supplement: DataSheet1.pdf [file DataSheet1.pdf]

## *Supplementary Material*

### **Cotton genotypic variability in the transpiration response to progressive soil drying**

**Katrina J. Broughton<sup>\*1†</sup>, Eleanor L. Bate<sup>1,2</sup>, Corey W. Cutler<sup>1,3</sup>, Christopher N. Allen<sup>1</sup>, Alan J. E. Thompson<sup>1</sup>, Warren C. Conaty<sup>1†</sup>**

**\* Correspondence:** Katie Broughton: [katie.broughton@csiro.au](mailto:katie.broughton@csiro.au)

#### **1 Supplementary Tables**

**S1: Equations of regressions between the number of leaves and leaf area for each genotype of each water treatment in each experiment.**

| <b>Experiment</b> | <b>Genotype</b> | <b>Well-Watered</b>    | <b>R<sup>2</sup></b> | <b>Water Deficit</b>   | <b>R<sup>2</sup></b> |
|-------------------|-----------------|------------------------|----------------------|------------------------|----------------------|
| 1                 | CS 50           | $y = 68.808x - 268.39$ | 0.80                 | $y = 48.253x + 522.13$ | 0.76                 |
|                   | CSX2027         | $y = 65.596x - 604.3$  | 0.91                 | $y = 54.592x - 172.83$ | 0.85                 |
|                   | CSX8521         | $y = 48.956x + 404.46$ | 0.95                 | $y = 48.938x + 557.44$ | 0.96                 |
|                   | DeltaPEARL      | $y = 67.06x + 252.91$  | 0.94                 | $y = 74.555x - 278.36$ | 0.90                 |
|                   | RC-89           | $y = 38.905x + 263.82$ | 0.96                 | $y = 34.308x + 369.85$ | 0.85                 |
|                   | Sicot 746B3F    | $y = 50.45x + 255.8$   | 0.95                 | $y = 43.267x + 403.3$  | 0.88                 |
| 2                 | CS 50           | $y = 79.447x - 218.47$ | 0.96                 | $y = 65.195x - 112.33$ | 0.92                 |
|                   | CSX2027         | $y = 66.8x - 190.87$   | 0.84                 | $y = 49.299x + 105.69$ | 0.87                 |
|                   | CSX8521         | $y = 65.275x - 177.95$ | 0.91                 | $y = 52.973x + 12.651$ | 0.88                 |
|                   | DeltaPEARL      | $y = 78.862x - 90.742$ | 0.95                 | $y = 54.263x + 125.75$ | 0.90                 |
|                   | RC-89           | $y = 77.869x - 350.65$ | 0.88                 | $y = 57.071x - 135.68$ | 0.91                 |
|                   | Sicot 746B3F    | $y = 69.239x + 98.434$ | 0.98                 | $y = 57.174x + 40.64$  | 0.87                 |
| 3                 | CS 50           | $y = 54.904x - 347.01$ | 0.89                 | $y = 34.498x + 94.085$ | 0.72                 |
|                   | CSX2027         | $y = 56.32x - 389.91$  | 0.89                 | $y = 33.32x + 144.81$  | 0.77                 |
|                   | CSX8521         | $y = 54.745x - 399.82$ | 0.93                 | $y = 46.896x - 268.58$ | 0.85                 |
|                   | DeltaPEARL      | $y = 53.831x - 324.97$ | 0.87                 | $y = 39.812x - 11.595$ | 0.78                 |
|                   | RC-89           | $y = 51.678x - 261.71$ | 0.88                 | $y = 30.344x + 166.47$ | 0.62                 |
|                   | Sicot 746B3F    | $y = 55.979x - 460.28$ | 0.88                 | $y = 39.725x - 107.98$ | 0.94                 |

**S2: Equations of regressions between day of experiment and leaf area for each plant in each experiment.**

| Experiment   | Genotype   | Rep                    | Well-Watered           | R <sup>2</sup>                      | Water -Deficit                      | R <sup>2</sup> |
|--------------|------------|------------------------|------------------------|-------------------------------------|-------------------------------------|----------------|
| 1            | CS 50      | 1                      | $y = 79.56x + 1853.5$  | 0.88                                | $y = -4.7271x^2 + 248.84x + 1365.4$ | 0.99           |
|              |            | 2                      | $y = 290.97x + 1252.8$ | 0.99                                | $y = -5.3753x^2 + 272.16x + 1209.7$ | 0.99           |
|              |            | 3                      | $y = 101.9x + 1425.9$  | 0.92                                | $y = -3.5641x^2 + 191.73x + 967.78$ | 0.99           |
|              |            | 4                      | $y = 216.2x + 882.61$  | 0.99                                | $y = -6.3139x^2 + 268.76x + 1055.7$ | 0.99           |
|              |            | 5                      | $y = 132.76x + 1047.4$ | 0.97                                | $y = -7.4459x^2 + 311.6x + 1159.9$  | 0.96           |
|              | CSX2027    | 1                      | $y = 172.6x + 937.64$  | 0.99                                | $y = -3.2384x^2 + 213.11x + 821.05$ | 0.99           |
|              |            | 2                      | $y = 179.23x + 985.2$  | 0.99                                | $y = -4.5064x^2 + 243.52x + 769.84$ | 0.99           |
|              |            | 3                      | $y = 190.93x + 1103.4$ | 0.99                                | $y = -6.086x^2 + 269.05x + 828.07$  | 0.99           |
|              |            | 4                      | $y = 177.09x + 1784.6$ | 0.96                                | $y = -2.9951x^2 + 221.57x + 923.12$ | 0.99           |
|              |            | 5                      | $y = 166.82x + 811.29$ | 0.99                                | $y = -4.4535x^2 + 253.52x + 710.38$ | 0.99           |
|              | CSX8521    | 1                      | $y = 161.01x + 2176.1$ | 0.99                                | $y = -2.6927x^2 + 131.6x + 2330.4$  | 0.92           |
|              |            | 2                      | $y = 83.883x + 1398.9$ | 0.97                                | $y = -2.8015x^2 + 166.4x + 1810.4$  | 0.99           |
|              |            | 3                      | $y = 129.27x + 1476.6$ | 0.99                                | $y = -2.9779x^2 + 155.28x + 1371.1$ | 0.99           |
|              |            | 4                      | $y = 167.69x + 1790.5$ | 0.99                                | $y = -4.1675x^2 + 204.08x + 1525.3$ | 0.99           |
|              |            | 5                      | $y = 103.87x + 1579.7$ | 0.99                                | $y = -2.807x^2 + 148.4x + 1287.1$   | 0.99           |
|              | DeltaPEARL | 1                      | $y = 89.414x + 922.24$ | 0.99                                | $y = -3.6493x^2 + 190.11x + 470.53$ | 0.96           |
|              |            | 2                      | $y = 155.67x + 514.52$ | 0.99                                | $y = -2.0852x^2 + 127.91x + 533.28$ | 0.98           |
|              |            | 3                      | $y = 93.051x + 698.23$ | 0.98                                | $y = -1.4279x^2 + 126.81x + 575.31$ | 0.99           |
|              |            | 4                      | $y = 137.72x + 384.93$ | 0.99                                | $y = -2.7341x^2 + 174x + 485.15$    | 0.99           |
|              |            | 5                      | $y = 108.5x + 442.53$  | 0.99                                | $y = -2.0676x^2 + 150.58x + 358.56$ | 0.99           |
|              | RC-89      | 1                      | $y = 91.254x + 1203.1$ | 0.99                                | $y = -2.9126x^2 + 146.24x + 814.7$  | 0.98           |
|              |            | 2                      | $y = 89.153x + 1260.5$ | 0.99                                | $y = -3.5817x^2 + 161.94x + 1079$   | 0.99           |
|              |            | 3                      | $y = 102.85x + 1123.3$ | 0.99                                | $y = -3.5554x^2 + 179.39x + 1122.6$ | 0.99           |
|              |            | 4                      | $y = 115.75x + 1301.4$ | 0.99                                | $y = -1.998x^2 + 108.83x + 892.52$  | 0.96           |
|              |            | 5                      | $y = 63.305x + 1065.2$ | 0.98                                | $y = -2.4481x^2 + 121.67x + 892.33$ | 0.98           |
| Sicot 746B3F | 1          | $y = 93.42x + 1806.1$  | 0.97                   | $y = -3.7551x^2 + 182.52x + 1686.6$ | 0.99                                |                |
|              | 2          | $y = 102.05x + 1405.7$ | 0.99                   | $y = -1.7632x^2 + 114.89x + 648.81$ | 0.99                                |                |
|              | 3          | $y = 101.64x + 1458.3$ | 0.98                   | $y = -3.7123x^2 + 193.82x + 1184.4$ | 0.99                                |                |
|              | 4          | $y = 119.55x + 1438.1$ | 0.99                   | $y = -1.7486x^2 + 107.16x + 906.57$ | 0.99                                |                |
|              | 5          | $y = 102.55x + 1231.1$ | 0.99                   | $y = -0.8452x^2 + 83.377x + 1072.9$ | 0.99                                |                |
| 2            | CS 50      | 1                      | $y = 172.51x + 578.27$ | 0.99                                | $y = -6.0801x^2 + 220.42x + 190.84$ | 0.99           |
|              |            | 2                      | $y = 200.89x + 589.62$ | 0.95                                | $y = -10.134x^2 + 302.3x + 430.81$  | 0.99           |
|              |            | 3                      | $y = 220.18x + 427.32$ | 0.99                                | $y = -10.134x^2 + 320.46x + 341.14$ | 0.99           |
|              |            | 4                      | $y = 206.56x + 862.01$ | 0.96                                | $y = -11.35x^2 + 324.6x + 310.42$   | 0.98           |
|              |            | 5                      | $y = 171.38x + 253.67$ | 0.99                                | $y = -5.6748x^2 + 189.54x + 487.47$ | 0.86           |

|   |              |   |                        |      |                                     |      |
|---|--------------|---|------------------------|------|-------------------------------------|------|
|   | CSX2027      | 1 | $y = 191.81x + 158.4$  | 0.99 | $y = -2.7265x^2 + 158.14x + 121.32$ | 0.99 |
|   |              | 2 | $y = 118.33x + 151.72$ | 0.99 | $y = -9.5429x^2 + 307.28x + 292.95$ | 0.98 |
|   |              | 3 | $y = 144.1x + 506.71$  | 0.93 | $y = -8.8612x^2 + 299.24x + 86.554$ | 0.99 |
|   |              | 4 | $y = 194.67x + 576.38$ | 0.99 | $y = -9.202x^2 + 323.3x + 226.49$   | 0.99 |
|   |              | 5 | $y = 191.81x + 893.2$  | 0.95 | $y = -4.7714x^2 + 195.63x + 219.47$ | 0.99 |
|   | CSX8521      | 1 | $y = 177.18x + 591.36$ | 0.99 | $y = -11.323x^2 + 370.47x - 60.588$ | 0.99 |
|   |              | 2 | $y = 164.12x + 154.02$ | 0.99 | $y = -8.6589x^2 + 284.95x + 244.21$ | 0.95 |
|   |              | 3 | $y = 189.3x + 566.19$  | 0.97 | $y = -7.9929x^2 + 264.03x + 323.2$  | 0.99 |
|   |              | 4 | $y = 155.73x + 266.85$ | 0.99 | $y = -8.6589x^2 + 298x + 257.26$    | 0.98 |
|   |              | 5 | $y = 207.02x + 607.22$ | 0.99 | $y = -9.9911x^2 + 321.18x + 346.38$ | 0.99 |
|   | DeltaPEARL   | 1 | $y = 201.74x + 421.68$ | 0.99 | $y = -5.6039x^2 + 225.28x + 176.23$ | 0.99 |
|   |              | 2 | $y = 199.5x + 604.37$  | 0.96 | $y = -8.4059x^2 + 268.43x + 1144$   | 0.89 |
|   |              | 3 | $y = 173.72x + 292.79$ | 0.99 | $y = -3.2022x^2 + 226.08x + 173.03$ | 0.99 |
|   |              | 4 | $y = 243.21x + 121.31$ | 0.99 | $y = -11.208x^2 + 336.24x + 494.53$ | 0.96 |
|   |              | 5 | $y = 244.33x + 441.86$ | 0.99 | $y = -3.2022x^2 + 174.52x + 334.42$ | 0.99 |
|   | RC-89        | 1 | $y = 268.77x - 160.64$ | 0.98 | $y = -6.7993x^2 + 303.09x - 199.91$ | 0.97 |
|   |              | 2 | $y = 253.09x + 19.665$ | 0.99 | $y = -6.7993x^2 + 291.89x + 46.462$ | 0.99 |
|   |              | 3 | $y = 283.33x - 269.27$ | 0.99 | $y = -10.399x^2 + 328.77x + 103.34$ | 0.96 |
|   |              | 4 | $y = 260.93x - 325.26$ | 0.95 | $y = -9.999x^2 + 320.69x + 20.865$  | 0.99 |
|   |              | 5 | $y = 291.17x + 561.69$ | 0.99 | $y = -10.399x^2 + 301.89x - 18.731$ | 0.99 |
|   | Sicot 746B3F | 1 | $y = 166.12x + 265.91$ | 0.99 | $y = -4.2632x^2 + 227.37x + 229.81$ | 0.99 |
|   |              | 2 | $y = 172.09x + 197.27$ | 0.99 | $y = -5.3291x^2 + 244.92x + 147.18$ | 0.99 |
|   |              | 3 | $y = 167.12x + 480.78$ | 0.99 | $y = -5.6843x^2 + 236.18x + 438.29$ | 0.99 |
|   |              | 4 | $y = 171.1x + 260.94$  | 0.99 | $y = -6.3949x^2 + 262.47x + 99.359$ | 0.95 |
|   |              | 5 | $y = 170.1x + 603.13$  | 0.96 | $y = -8.8818x^2 + 282.87x + 363.47$ | 0.98 |
| 3 | CS 50        | 1 | $y = 91.105x + 509.53$ | 0.96 | $y = -0.3659x^2 + 61.443x + 517.82$ | 0.92 |
|   |              | 2 | $y = 74.087x + 940.13$ | 0.97 | $y = -2.5613x^2 + 73.589x + 323.77$ | 0.97 |
|   |              | 3 | $y = 73.056x + 488.91$ | 0.95 | $y = -2.5613x^2 + 92.497x + 374.65$ | 0.97 |
|   |              | 4 | $y = 87.151x + 636.74$ | 0.94 | $y = -4.7566x^2 + 142.8x + 458.38$  | 0.82 |
|   |              | 5 | $y = 79.416x + 799.87$ | 0.97 | $y = -2.1954x^2 + 82.623x + 383.38$ | 0.97 |
|   | CSX2027      | 1 | $y = 104.42x$          | 0.97 | $y = -2.4987x^2 + 88.039x + 583.25$ | 0.91 |
|   |              | 2 | $y = 88.406x + 590.38$ | 0.96 | $y = -2.1233x^2 + 74.857x + 542.36$ | 0.99 |
|   |              | 3 | $y = 104.72x + 635.75$ | 0.98 | $y = -3.8928x^2 + 120.99x + 581.51$ | 0.94 |
|   |              | 4 | $y = 96.117x + 637.36$ | 0.99 | $y = -4.7228x^2 + 145.07x + 649.92$ | 0.78 |
|   |              | 5 | $y = 100.6x + 982.2$   | 0.85 | $y = -1.9639x^2 + 67.601x + 482.97$ | 0.77 |
|   | CSX8521      | 1 | $y = 83.876x + 372.91$ | 0.97 | $y = -5.1123x^2 + 120.23x + 472.94$ | 0.99 |
|   |              | 2 | $y = 128.4x + 844.58$  | 0.84 | $y = -4.3258x^2 + 113.04x + 661.13$ | 0.95 |
|   |              | 3 | $y = 87.016x + 439.42$ | 0.99 | $y = -5.1122x^2 + 134.27x + 477.19$ | 0.96 |

Supplementary Material

|              |   |                        |      |                                     |      |
|--------------|---|------------------------|------|-------------------------------------|------|
|              | 4 | $y = 116.39x + 587.04$ | 0.98 | $y = -1.573x^2 + 80.139x + 801.67$  | 0.97 |
|              | 5 | $y = 89.788x + 564.5$  | 0.92 | $y = -6.6853x^2 + 149x + 289.99$    | 0.99 |
| DeltaPEARL   | 1 | $y = 84.183x + 624.05$ | 0.98 | $y = -2.2682x^2 + 81.458x + 595.12$ | 0.98 |
|              | 2 | $y = 102.3x + 716.58$  | 0.96 | $y = -3.0243x^2 + 92.271x + 377.09$ | 0.99 |
|              | 3 | $y = 98.924x + 629.55$ | 0.95 | $y = -2.2682x^2 + 77.906x + 655.33$ | 0.99 |
|              | 4 | $y = 78.499x + 413.41$ | 0.96 | $y = -1.5121x^2 + 63.54x + 774.79$  | 0.99 |
|              | 5 | $y = 83.65x + 562.95$  | 0.98 | $y = -3.0243x^2 + 95.823x + 475.66$ | 0.98 |
| RC-89        | 1 | $y = 49.338x + 716.04$ | 0.62 | $y = -2.1156x^2 + 75.405x + 384.16$ | 0.84 |
|              | 2 | $y = 111.1x + 357.41$  | 0.95 | $y = -6.2305x^2 + 157.61x + 320.42$ | 0.92 |
|              | 3 | $y = 83.94x + 703.03$  | 0.85 | $y = -2.6067x^2 + 71.52x + 702.39$  | 0.50 |
|              | 4 | $y = 120.15x + 454.55$ | 0.96 | $y = -2.2357x^2 + 57.724x + 732.9$  | 0.79 |
|              | 5 | $y = 82.982x + 671.38$ | 0.92 | $y = -3.9764x^2 + 87.344x + 612.91$ | 0.80 |
| Sicot 746B3F | 1 | $y = 90.179x + 478.85$ | 0.85 | $y = -2.8792x^2 + 99.776x + 373.44$ | 0.74 |
|              | 2 | $y = 75.717x + 595.83$ | 0.72 | $y = -2.95x^2 + 80.708x + 708.16$   | 0.84 |
|              | 3 | $y = 140.79x + 201.01$ | 0.98 | $y = -2.95x^2 + 80.708x + 708.16$   | 0.84 |
|              | 4 | $y = 160.29x + 170.08$ | 0.86 | $y = -4.1798x^2 + 121.72x + 283.34$ | 0.96 |
|              | 5 | $y = 85.513x + 713.27$ | 0.84 | $y = -1.0933x^2 + 46.441x + 597.71$ | 0.90 |

**S3: The Fraction of Transpirable Soil Water breakpoint (FTSW Breakpoint), Transpiration Ratio breakpoint (TR Breakpoint) and the initial slope (Slope 1) for the breakpoint regressions between Transpiration Ratio and FTSW for each replicate of each genotype in Experiments 1, 2 and 3. Note, the slope of the line after the breakpoint was forced to be zero.**

| Genotype   | Rep | Exp. 1          |               |         | Exp. 2          |               |         | Exp. 3          |               |         |
|------------|-----|-----------------|---------------|---------|-----------------|---------------|---------|-----------------|---------------|---------|
|            |     | FTSW Breakpoint | TR Breakpoint | Slope 1 | FTSW Breakpoint | TR Breakpoint | Slope 1 | FTSW Breakpoint | TR Breakpoint | Slope 1 |
| CS 50      | 1   | 0.136           | 1.02          | 7.12    | 0.313           | 1.23          | 3.23    | 0.572           | 1.1           | 1.69    |
|            | 2   | 0.142           | 0.98          | 6.16    | 0.258           | 1.18          | 4.19    |                 |               |         |
|            | 3   | 0.174           | 1.06          | 5.23    | 0.222           | 1.02          | 4.27    | 0.510           | 1.2           | 2.11    |
|            | 4   | 0.246           | 1.10          | 3.54    | 0.397           | 1.05          | 2.29    | 0.603           | 1.2           | 1.81    |
|            | 5   | 0.251           | 1.19          | 3.79    | 0.279           | 1.18          | 3.90    | 0.520           | 1.3           | 2.36    |
| CSX2027    | 1   | 0.252           | 0.96          | 3.11    | 0.187           | 0.98          | 4.80    | 0.505           | 1.2           | 2.30    |
|            | 2   | 0.211           | 0.95          | 3.80    | 0.248           | 0.93          | 3.27    | 0.518           | 1.2           | 2.13    |
|            | 3   | 0.198           | 0.94          | 4.01    | 0.287           | 0.91          | 2.73    | 0.424           | 1.1           | 2.35    |
|            | 4   | 0.220           | 0.98          | 3.67    | 0.321           | 0.92          | 2.37    | 0.335           | 0.9           | 2.40    |
|            | 5   | 0.250           | 0.92          | 2.84    | 0.271           | 0.88          | 2.65    | 0.346           | 0.9           | 2.08    |
| CSX8521    | 1   | 0.139           | 1.07          | 6.55    | 0.257           | 0.92          | 2.92    | 0.449           | 1.1           | 2.24    |
|            | 2   | 0.151           | 1.03          | 6.07    | 0.262           | 0.91          | 2.81    | 0.531           | 1.1           | 1.87    |
|            | 3   | 0.162           | 0.94          | 4.74    | 0.139           | 0.83          | 4.96    | 0.293           | 0.8           | 2.42    |
|            | 4   | 0.162           | 0.88          | 4.02    | 0.223           | 0.84          | 3.02    | 0.333           | 0.7           | 1.60    |
|            | 5   | 0.191           | 0.96          | 3.81    | 0.266           | 0.86          | 2.56    | 0.268           | 0.7           | 1.81    |
| DeltaPEARL | 1   | 0.115           | 0.99          | 6.98    | 0.215           | 0.85          | 3.62    | 0.419           | 1.0           | 2.32    |
|            | 2   | 0.150           | 0.97          | 5.46    | 0.213           | 0.85          | 3.52    | 0.554           | 1.1           | 1.72    |
|            | 3   | 0.142           | 0.96          | 5.84    |                 |               |         | 0.367           | 1.1           | 2.74    |
|            | 4   | 0.133           | 0.90          | 5.83    | 0.236           | 0.88          | 2.43    | 0.388           | 1.1           | 2.62    |
|            | 5   | 0.167           | 0.89          | 4.03    | 0.216           | 1.12          | 4.29    |                 |               |         |
| RC-89      | 1   | 0.124           | 0.98          | 7.19    | 0.100           | 0.86          | 6.91    | 0.426           | 1.2           | 2.57    |
|            | 2   | 0.137           | 0.95          | 6.08    | 0.139           | 0.91          | 5.45    | 0.434           | 1.1           | 2.22    |
|            | 3   | 0.157           | 0.93          | 5.27    | 0.145           | 0.89          | 4.89    | 0.470           | 1.0           | 1.80    |

## Supplementary Material

|        |   |       |      |      |       |      |      |       |     |      |
|--------|---|-------|------|------|-------|------|------|-------|-----|------|
|        | 4 | 0.148 | 0.94 | 5.20 | 0.115 | 0.82 | 5.48 | 0.420 | 1.0 | 2.10 |
|        | 5 | 0.202 | 0.93 | 3.20 | 0.132 | 0.83 | 4.30 | 0.304 | 0.7 | 1.76 |
| Sicot  |   |       |      |      |       |      |      |       |     |      |
| 746B3F | 1 | 0.161 | 0.87 | 5.28 | 0.107 | 0.81 | 6.62 | 0.456 | 1.0 | 1.94 |
|        | 2 | 0.182 | 0.90 | 4.52 | 0.156 | 0.88 | 4.72 | 0.460 | 1.0 | 1.83 |
|        | 3 | 0.208 | 0.92 | 3.61 | 0.123 | 0.87 | 5.03 | 0.313 | 0.8 | 2.13 |
|        | 4 | 0.225 | 0.92 | 3.13 | 0.220 | 0.94 | 2.90 | 0.322 | 0.7 | 1.63 |
|        | 5 | 0.171 | 0.94 | 4.33 |       |      |      | 0.231 | 0.8 | 2.37 |

**S4: Regression statistics and equations for each genotype's fitted photosynthesis and conductance responses with respect to the fraction of transpirable soil water (FTSW) content.**

|                     | Photosynthesis |          |                                               |
|---------------------|----------------|----------|-----------------------------------------------|
|                     | r2             | p- value | Equation                                      |
| <b>CS 50</b>        | 0.76           | <0.0001  | $y = 40.0 / (1 + \exp(-(x - 0.468 / 0.300)))$ |
| <b>CSX2027</b>      | 0.5            | <0.0001  | $y = 36.9 / (1 + \exp(-(x - 0.260 / 0.225)))$ |
| <b>CSX8521</b>      | 0.61           | 0.0002   | $y = 54.5 / (1 + \exp(-(x - 0.711 / 0.521)))$ |
| <b>DeltaPEARL</b>   | 0.38           | 0.0001   | $y = 29.4 / (1 + \exp(-(x - 0.138 / 0.185)))$ |
| <b>RC-89</b>        | 0.31           | 0.001    | $y = 28.2 / (1 + \exp(-(x - 0.062 / 0.104)))$ |
| <b>Sicot 746B3F</b> | 0.49           | <0.0001  | $y = 37.7 / (1 + \exp(-(x - 0.292 / 0.310)))$ |
|                     | Conductance    |          |                                               |
|                     | r2             | p- value | Equation                                      |
| <b>CS 50</b>        | 0.90           | <0.0001  | $y = 1.23 / (1 + \exp(-(x - 0.507 / 0.116)))$ |
| <b>CSX2027</b>      | 0.66           | <0.0001  | $y = 1.54 / (1 + \exp(-(x - 0.501 / 0.200)))$ |
| <b>CSX8521</b>      | 0.6            | <0.0001  | $y = 2.24 / (1 + \exp(-(x - 0.833 / 0.297)))$ |
| <b>DeltaPEARL</b>   | 0.54           | <0.0001  | $y = 513.8 / (1 + \exp(-(x - 3.68 / 0.461)))$ |
| <b>RC-89</b>        | 0.35           | 0.0003   | $y = 1.06 / (1 + \exp(-(x - 0.255 / 0.216)))$ |
| <b>Sicot 746B3F</b> | 0.51           | <0.0001  | $y = 1.38 / (1 + \exp(-(x - 0.442 / 0.223)))$ |
